# Supplementary material for: Analysis of the Related Risk Factors of Inguinal Lymph Node Metastasis in Patients with Penile Cancer: A Cross-sectional Study
Source: Research Square preprint supplement (doi:10.21203/rs.3.rs-531246/v1), 2021-05-18
Supplement: Supplementary file 1 [file de8da8613e146f2d39eeeeb9.xlsx]

## Sheet: Sheet1
Subgroud	N	OR,95％CI	P value	P for interaction
X= Maxium_ILN
Age ,y				0.304
<60	42	1.3 (0.4, 4.9)	0.666
>=60	68	3.2 (1.1, 9.1)	0.029
Onset_time ,m				0.627
<12	76	2.5 (1.0, 6.6)	0.058
>=12	34	1.6 (0.3, 7.6)	0.54
Phimosis				0.164
no	58	5.0 (1.3, 18.8)	0.017
yes	52	1.0 (0.2, 4.1)	0.982
Cornification				0.967
no	74	2.3 (0.7, 7.9)	0.18
yes	36	2.5 (0.5, 12.3)	0.272
Nerve_infiltration				0.996
no	92	2.2 (0.8, 6.0)	0.132
yes	18	7.0 (0.3, 181.5)	0.241
X= T_stage
Age ,y				0.98
<60	42	2.7 (0.5, 13.5)	0.227
>=60	68	3.8 (1.0, 14.5)	0.046
Onset_time ,m				0.971
<12	76	2.3 (0.7, 7.0)	0.158
>=12	34	4.2 (0.6, 28.8)	0.142
Number_ILN				0.588
＜3	46	3.7 (0.9, 15.0)	0.069
≥3	64	2.1 (0.5, 9.3)	0.336
Phimosis				0.446
no	58	5.4 (1.3, 21.9)	0.017
yes	52	1.4 (0.3, 6.3)	0.65
Cornification				0.069
no	74	5.0 (1.4, 17.2)	0.011
yes	36	0.8 (0.2, 4.0)	0.766
X= differention
Age,y				0.12
<60	42	0.9 (0.2, 4.5)	0.928
>=60	68	7.2 (1.7, 30.4)	0.007
Onset_time,m				0.09
<12	76	5.4 (1.3, 21.7)	0.017
>=12	34	1.4 (0.3, 6.7)	0.643
Number_ILN				0.148
＜3	46	1.0 (0.2, 4.1)	0.985
≥3	64	12.0 (1.9, 75.1)	0.008
Phimosis				0.62
no	58	2.2 (0.5, 9.0)	0.27
yes	52	3.5 (0.9, 14.3)	0.078
Cornification				0.634
no	74	3.1 (0.9, 10.8)	0.068
yes	36	5.4 (0.9, 34.5)	0.072
Nerve_infiltration				0.551
no	92	4.1 (1.4, 12.2)	0.01
yes	18	0.4 (0.1, 9.4)	0.59
X= LVI
Onset_time ,m				0.631
<12	76	2.8 (0.6, 13.2)	0.182
>=12	34	1.3 (0.1, 13.0)	0.799
Number_ILN				0.702
＜3	46	3.6 (0.2, 53.2)	0.351
≥3	64	5.9 (1.1, 32.6)	0.044
Phimosis				0.201
no	58	1.2 (0.2, 6.2)	0.85
yes	52	8.3 (0.7, 91.6)	0.085
Cornification				0.111
no	74	4.9 (0.8, 29.7)	0.083
yes	36	1.1 (0.1, 11.1)	0.933
Nerve_infiltration				0.138
no	92	7.9 (0.9, 73.4)	0.068
yes	18	3.0 (0.2, 54.2)	0.457
